# Supplementary material for: RhoC Is an Unexpected Target of RhoGDI2 in Prevention of Lung Colonization of Bladder Cancer
Source: Oxford University Press journal article supplement (doi:10.1158/1541-7786.mcr-14-0420), 2014-12-16
Supplement: 15417786mcr140420-sup-135271_1_supp_2728258_nqh0qq.doc [file 15417786mcr140420-sup-135271_1_supp_2728258_nqh0qq.doc]

Supplementary Table 1. Mass spectrometry results of proteins co-immunoprecipitating with RhoGDI2

3.25

22 kDa

IPI00000041

Rho-related GTP-binding protein RhoB

3.25

22 kDa

IPI00000874

Peroxiredoxin-1

4.88

21 kDa

IPI00442073

Cysteine and glycine-rich protein 1

4.88

20 kDa

IPI00033494

Myosin regulatory light chain 12B

4.88

21 kDa

IPI00017342

Rho-related GTP-binding protein RhoG

4.88

22 kDa

IPI00550363

Transgelin-2

4.88

21 kDa

IPI00007189

Isoform 1 of Cell division control protein 42 homolog

4.88

22 kDa

IPI00478231

Transforming protein RhoA

6.5

24 kDa

IPI00029114

Peptidyl-tRNA hydrolase ICT1, mitochondrial

9.76

21 kDa

IPI00016786

Isoform 2 of Cell division control protein 42 homolog (Cdc42)

9.76

22 kDa

IPI00027434

Rho-related GTP-binding protein RhoC

9.76

24 kDa

IPI00646304

Peptidyl-prolyl cis-trans isomerase B

13.01

21 kDa

IPI00010271

Isoform A of Ras-related C3 botulinum toxin substrate 1 (Rac1)

14.63

21 kDa

IPI00010270

Ras-related C3 botulinum toxin substrate 2 (Rac2)

**Xcorr**

**MW**

**Accession #**

**Protein**
